# Supplementary material for: A three-dimensional lead iodide perovskite analog featuring hydrogen-bonded dual monovalent cations
Source: Royal Society of Chemistry journal article supplement (doi:10.1039/d4sc05585c), 2024-01-01
Supplement: d4sc05585c1.pdf [file d4sc05585c1.pdf]

## **Electronic Supplementary Information**

### **A Three-Dimensional Lead Iodide Perovskite Analog Featuring Hydrogen-bonded Dual Monovalent Cations**

Wei Wang, Cheng-Dong Liu, Chang-Chun Fan, Wen Zhang\*

Jiangsu Key Laboratory for Science and Applications of Molecular Ferroelectrics and School of Chemistry and Chemical Engineering, Southeast University, Nanjing 211189, China.

Email: [zhangwen@seu.edu.cn](mailto:zhangwen@seu.edu.cn)

## Experimental section

### Starting materials

Morpholine (98%), ammonium iodide (98%), lead iodide (PbI<sub>2</sub>, 99.9%), and hydroiodic acid (HI, 57 wt.% in H<sub>2</sub>O) were commercially available and used as received without further purification.

**Synthesis of 1.** PbI<sub>2</sub> powder (2 mmol, 0.922 g) and morpholine (2 mmol, 0.174 g) were dissolved in a solution containing 5 mL of aqueous HI and 0.1 mL of H<sub>3</sub>PO<sub>2</sub>. The mixture was heated above 110°C, then NH<sub>4</sub>I (4 mmol, 0.579 g) was added. The solution was gradually cooled to 90°C, during which red crystals or powder of compound **1** began to precipitate at the bottom of the beaker. The solution was left for additional hours to promote further crystal growth. Alternatively, compound **1** can also be synthesized at room temperature; however, this requires more NH<sub>4</sub>I and often results in a mixture of the desired phase and a morpholinium-based phase. Anal. Calcd. for C<sub>4</sub>H<sub>14</sub>N<sub>2</sub>OPb<sub>2</sub>I<sub>6</sub> (**1**): C, 3.75%; H, 1.10%; N, 2.19%; O, 1.25%. Found: C: 3.99%, H: 1.22%, N: 2.17%; O, 1.17%.

**General characterizations.** PXRD patterns were collected using a Rigaku SmartLab X-ray diffraction system. Thermogravimetric analysis (TGA) was performed using a NETZSCH TG209 F3 instrument for TGA, with a heating rate of 10 °C min<sup>-1</sup> under a nitrogen atmosphere. Ultraviolet-visible (UV-Vis) diffuse reflection spectra were acquired using a Shimadzu UV2600 spectrophotometer equipped with an ISR-2600Plus integrating sphere. Low frequency Raman spectra were acquired using 633 nm laser excitation on a HORIBA LabRAM HR Evolution equipment. The spectra were collected from -300 cm<sup>-1</sup> to 300 cm<sup>-1</sup>. The FT-IR spectra were recorded using Nicolet iS50 instrument with a transmission method. The sample of **1** was mixed with KBr and prepared as a KBr pellet (1% *wt*). Photoluminescence (PL) spectra were obtained through analysis on an Edinburgh FLS1000 steady-state/transient-state fluorescence spectrometer. Elemental analysis was performed using the Elementar Vario Micro Cube. The CHN determination method involves combusting the sample while the O method employs high-temperature cracking.

**Single-crystal X-ray Diffraction.** Crystallographic data of the compound were collected on a Rigaku Oxford Diffraction Supernova Dual Source, Cu at Zero equipped with an AtlasS2 CCD using Mo K $\alpha$  radiation and an XtaLAB Synergy R, DW system, HyPix diffractometer. CrystalClear 1.3.5 package was used to collect data, refine cells, and reduce data. SHELXL-2014 package was used to solve the structures by direct methods. All non-hydrogen atoms were

refined anisotropically. All the hydrogen atoms were generated geometrically. CCDC 2387432 contain the crystallographic data.

***I-V Measurement.*** A 565 nm LED (M565L3-M0087 1936, Thorlabs) was used. The light beam was concentrated between two electrodes fabricated from a silver coating on the crystal. Current signals were gathered by using a PDA FS-Pro 380 current meter. Light intensity was assessed by using a Si photodetector linked to a power meter (PM120VA, Thorlabs).

**Theoretical calculations.** DFT calculations were performed by using the Vienna ab initio simulation package.<sup>1</sup> The input structures were built by using the crystallographic data and optimized by fixing the cell. Thresholds of convergence criteria are set as  $10^{-7}$  eV and 0.02 eV/Å for energy differences during electronic steps and maximum forces in geometry optimization. The Perdew–Burke–Ernzerhof (PBE) functional within the generalized gradient approximation (GGA) was adopted to express exchange-correlation interaction.<sup>2,3</sup> The van der Waals interactions were evaluated by adopting DFT-D3 method.<sup>4</sup> The ion–electron interactions were described by projector augmented wave (PAW) potentials with the energy cutoff of 500 eV. The VASPKIT was used to perform postprocessing analysis.<sup>5</sup>

## References

- (1) Kresse, G.; Furthmüller, J. Efficient Iterative Schemes for Ab Initio Total-Energy Calculations Using a Plane-Wave Basis Set. *Phys. Rev. B* **1996**, *54*, 11169-11186.
- (2) Blöchl, P. E. Projector Augmented-Wave Method. *Phys. Rev. B* **1994**, *50*, 17953-17979.
- (3) Perdew, J. P.; Burke, K.; Ernzerhof, M. Generalized Gradient Approximation Made Simple. *Phys. Rev. Lett.* **1996**, *77*, 3865-3868.
- (4) Grimme, S.; Antony, J.; Ehrlich, S.; Krieg, H. A Consistent and Accurate Ab Initio Parametrization of Density Functional Dispersion Correction (DFT-D) for the 94 Elements H-Pu. *J. Chem. Phys.* **2010**, *132*, 154104.
- (5) Wang, V.; Xu, N.; Liu, J.-C.; Tang, G.; Geng, W.-T. Vaspkit: A User-Friendly Interface Facilitating High-Throughput Computing and Analysis Using Vasp Code. *Comput. Phys. Commun.* **2021**, *267*, 108033.

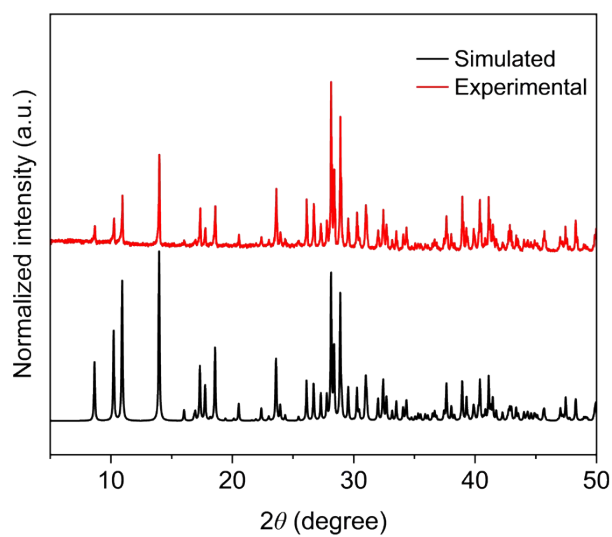

**Fig. S1** PXRD pattern of **1**.

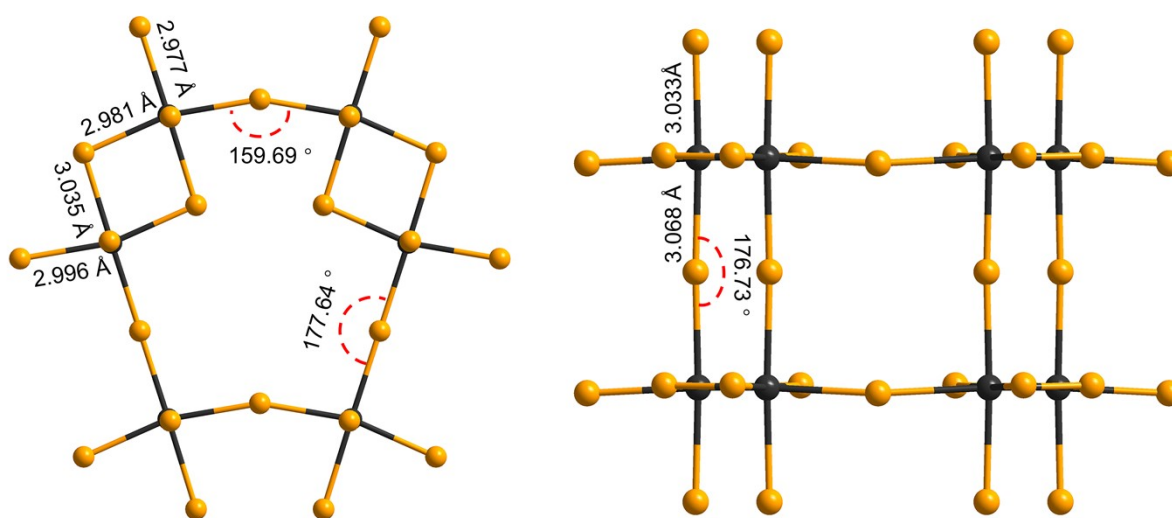

**Fig. S2** Summary of bond angles of  $(\text{TMEA})\text{Pb}_2\text{Br}_6$  between inter-dimer Pb–I–Pb bonds and bond lengths within each octahedron.

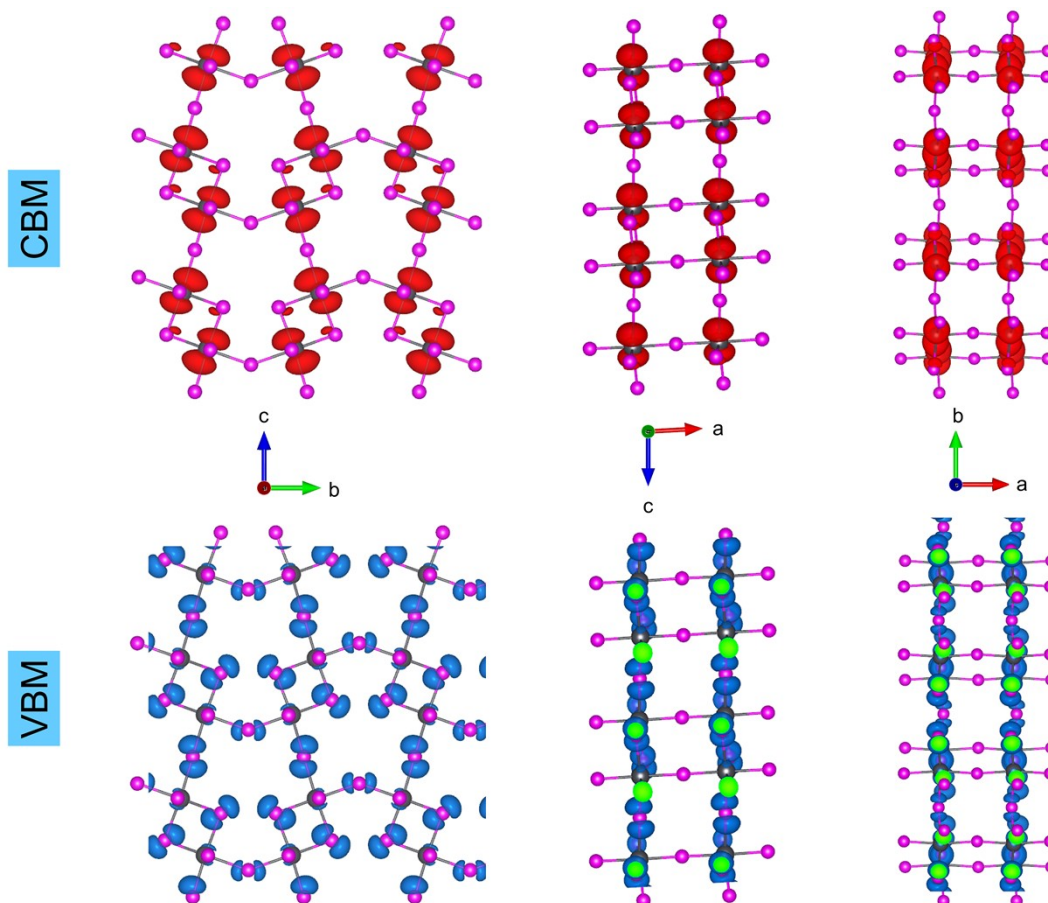

**Fig. S3** Partial charge densities of the CBM and the VBM observed from different direction.

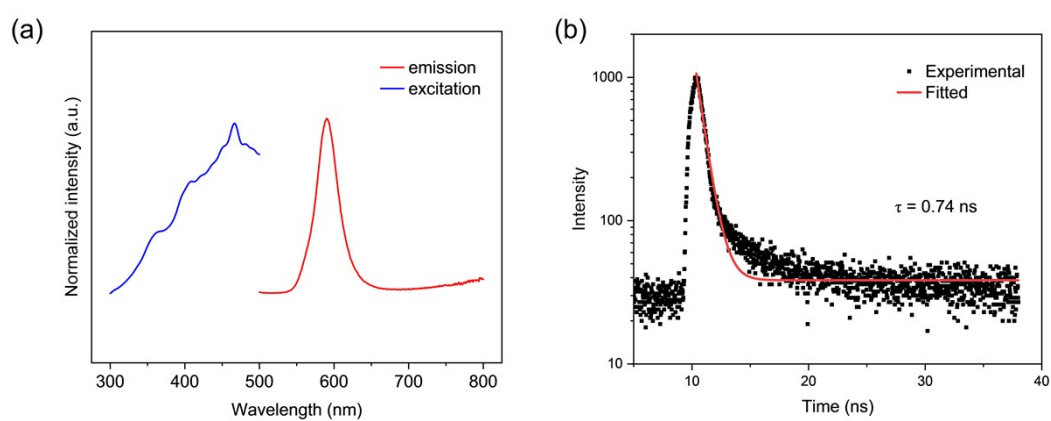

**Fig. S4** (a) Photoluminescence excitation and emission spectrum of **1**.(b) PL decay curve of **1** monitoring at 590 nm.

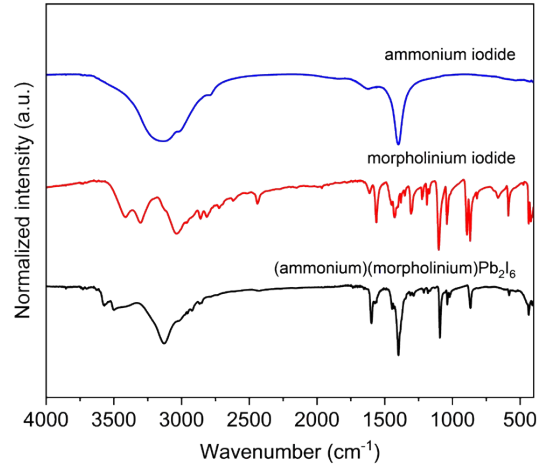

**Fig. S5** Fourier transform infrared spectroscopy of **1**.

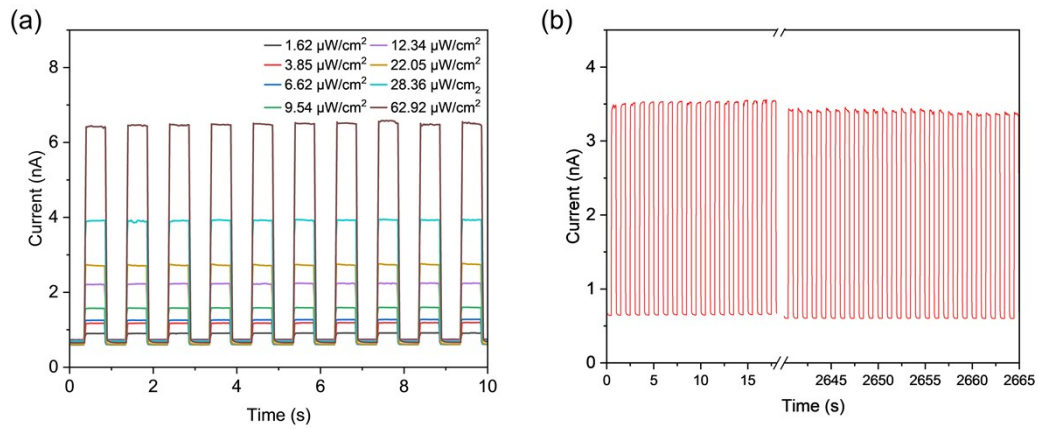

**Fig. S6** On-off switching under varying light powers with a 1 V bias. (b) time-dependent switching cycles of photocurrent response at 565 nm.

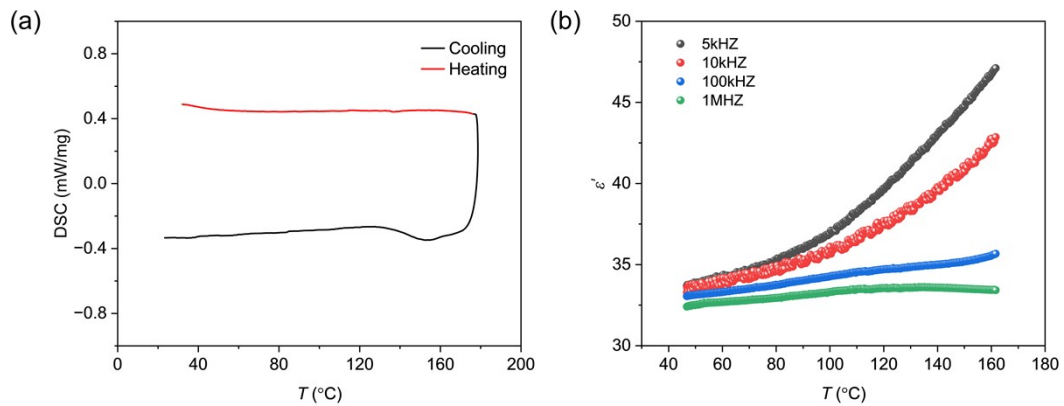

**Fig. S7** DSC (a) and Dielectric (b) measurements of **1**.

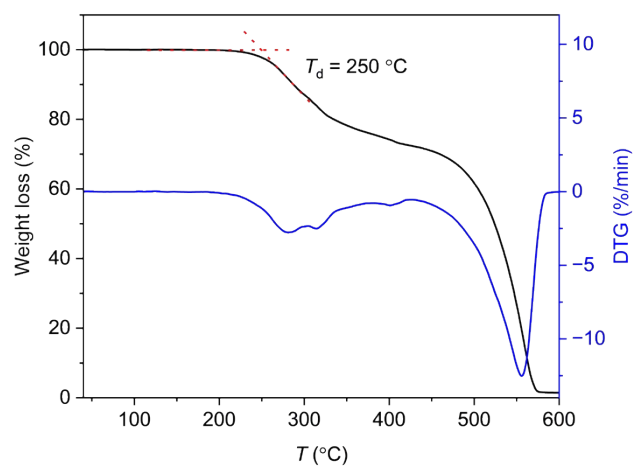

**Fig. S8** TGA curve of **1**.

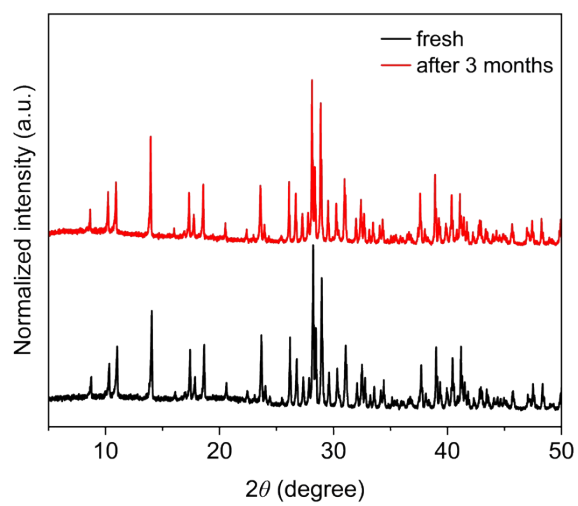

**Fig. S9** PXRD patterns of fresh sample and the one after 3 months.

**Table S1.** Crystallographic data and refinement parameters of **1**.

|                                                                                                           | <b>1</b>                                                                            |
|-----------------------------------------------------------------------------------------------------------|-------------------------------------------------------------------------------------|
| <i>T</i> / K                                                                                              | 152.98(10) K                                                                        |
| Formula                                                                                                   | (NH <sub>4</sub> )(C <sub>4</sub> H <sub>10</sub> NO)Pb <sub>2</sub> I <sub>6</sub> |
| Formula weight                                                                                            | 1281.95                                                                             |
| Crystal system                                                                                            | monoclinic                                                                          |
| Space group                                                                                               | <i>P</i> 2 <sub>1</sub> / <i>m</i>                                                  |
| <i>a</i> / Å                                                                                              | 6.3366(3)                                                                           |
| <i>b</i> / Å                                                                                              | 16.1613(7)                                                                          |
| <i>c</i> / Å                                                                                              | 10.1821(4)                                                                          |
| <i>α</i> / °                                                                                              | 90                                                                                  |
| <i>β</i> / °                                                                                              | 93.579(4)                                                                           |
| <i>γ</i> / °                                                                                              | 90                                                                                  |
| Volume / Å <sup>3</sup>                                                                                   | 1040.69(8)                                                                          |
| <i>Z</i>                                                                                                  | 2                                                                                   |
| <i>D</i> <sub>calc</sub> / g·cm <sup>-3</sup>                                                             | 4.091                                                                               |
| <i>μ</i> / mm <sup>-1</sup>                                                                               | 25.042                                                                              |
| <i>F</i> (000)                                                                                            | 1084.0                                                                              |
| 2 <i>θ</i> range / °                                                                                      | 4.008–61.856                                                                        |
| Reflns collected                                                                                          | 7163                                                                                |
| Independent reflns ( <i>R</i> <sub>int</sub> )                                                            | 2731(0.0333)                                                                        |
| no. parameters                                                                                            | 86                                                                                  |
| GOF                                                                                                       | 1.013                                                                               |
| <i>R</i> <sub>1</sub> <sup>[a]</sup> , <i>wR</i> <sub>2</sub> <sup>[b]</sup> [ <i>I</i> ≥ 2σ( <i>I</i> )] | 0.0347, 0.0987                                                                      |
| <i>R</i> <sub>1</sub> , <i>wR</i> <sub>2</sub> [all data]                                                 | 0.0381, 0.1003                                                                      |
| Δρ <sup>[c]</sup> / e·Å <sup>-3</sup>                                                                     | 2.24, -2.36                                                                         |

<sup>[a]</sup>  $R_1 = \sum ||F_o| - |F_c|| / \sum |F_o|$ .

<sup>[b]</sup>  $wR_2 = [\sum w(F_o^2 - F_c^2)^2 / \sum w(F_o^2)^2]^{1/2}$ .

<sup>[c]</sup> Maximum and minimum residual electron density.



**Table S2.** Summary of hydrogen bonds.

| Hydrogen bonds for <b>1</b>                            |         |           |           |          |
|--------------------------------------------------------|---------|-----------|-----------|----------|
| D–H···A                                                | D–H / Å | H···A / Å | D···A / Å | ∠DHA / ° |
| N(1)–H(1C)···I(2) <sup>i</sup>                         | 0.89(3) | 2.86(3)   | 3.628(7)  | 145(4)   |
| N(1)–H(1E)···O(1)                                      | 0.89(3) | 1.86(3)   | 2.732(15) | 165(11)  |
| N(2)–H(2A)···I1(1)                                     | 0.91    | 2.75      | 3.658(11) | 176      |
| N(2)–H(2B)···I(1) <sup>ii</sup>                        | 0.91    | 2.72      | 3.610(11) | 166      |
| Symmetry codes: (i) $x, 3/2-y, 1+z$ ; (ii) $1+x, y, z$ |         |           |           |          |

**Table S3.** Bond angles and bond lengths of **1**.

| Bond angles                                 | Angle / °    | Bond lengths             | Length / Å |
|---------------------------------------------|--------------|--------------------------|------------|
| I(2)—Pb(1)—I(1)                             | 85.879 (18)  | Pb(1)—I(1)               | 3.3065 (4) |
| I(2) <sup>i</sup> —Pb(1)—I(1)               | 87.787 (18)  | Pb(1)—I(2)               | 3.1600 (5) |
| I(2)—Pb(1)—I(2) <sup>i</sup>                | 173.60 (3)   | Pb(1)—I(2) <sup>i</sup>  | 3.1865 (5) |
| I(2)—Pb(1)—I(3) <sup>ii</sup>               | 89.329 (16)  | Pb(1)—I(3) <sup>ii</sup> | 3.2331 (6) |
| I(2) <sup>i</sup> —Pb(1)—I(3) <sup>ii</sup> | 89.298 (15)  | Pb(1)—I(3)               | 3.1157 (6) |
| I(2)—Pb(1)—I(4)                             | 94.440 (13)  | Pb(1)—I(4)               | 3.1703 (3) |
| I(3) <sup>ii</sup> —Pb(1)—I(1)              | 85.755 (17)  |                          |            |
| I(3)—Pb(1)—I(1)                             | 174.506 (18) |                          |            |
| I(3)—Pb(1)—I(2) <sup>i</sup>                | 96.629 (17)  |                          |            |
| I(3)—Pb(1)—I(2)                             | 89.643 (17)  |                          |            |
| I(3)—Pb(1)—I(3) <sup>ii</sup>               | 91.017 (15)  |                          |            |
| I(3)—Pb(1)—I(4)                             | 94.252 (12)  |                          |            |
| I(4)—Pb(1)—I(1)                             | 89.273 (15)  |                          |            |
| I(4)—Pb(1)—I(2) <sup>i</sup>                | 86.379 (12)  |                          |            |
| I(4)—Pb(1)—I(3) <sup>ii</sup>               | 173.535 (13) |                          |            |
| Pb(1)—I(1)—Pb(1) <sup>iii</sup>             | 146.16 (3)   |                          |            |
| Pb(1)—I(2)—Pb(1) <sup>iv</sup>              | 173.60 (3)   |                          |            |
| Pb(1)—I(3)—Pb(1) <sup>ii</sup>              | 88.982 (15)  |                          |            |
| Pb(1) <sup>v</sup> —I(4)—Pb(1)              | 180.0        |                          |            |

Symmetry codes: (i)  $x-1, y, z$ ; (ii)  $-x-1, -y+1, -z$ ; (iii)  $x, -y+3/2, z$ ; (iv)  $x+1, y, z$ ; (v)  $-x-1, -y+1, -z+1$ .

**Table S4.** Calculated volume of some cations.

|   | Cations                                                                                                                                     | Volume (Å <sup>3</sup> ) | Volume difference | Reference for used CIFs       |
|---|---------------------------------------------------------------------------------------------------------------------------------------------|--------------------------|-------------------|-------------------------------|
| 1 | 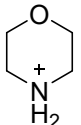<br>morpholinium                                           | 157                      | 0                 | This work                     |
| 2 | <br>thiomorpholinium                                       | 150                      | -4.5%             | 10.1016/j.ccllet.2021.07.039  |
| 3 | <br>3-hydroxypyrrolidin-1-ium                              | 128                      | -18.5%            | 10.1063/5.0035793             |
| 4 | <br>4-hydroxypiperidinium                                 | 153                      | 2.5%              | 10.1107/S010827019900956<br>7 |
| 5 | <br>tetrahydro-2H-pyran-4-aminium                        | 153                      | 2.5%              | 10.1021/jacs.9b12368          |
| 6 | <br>(dihydro-2H-3λ <sup>3</sup> -pyran-3(4H)-yl)ammonium | 176                      | 12.1%             | 10.1039/d4tc01531b            |

**Table S5.** Calculated hole ( $m_h$ ) and electron ( $m_e$ ) effective mass for **1**.

| direction | effective mass( $m_0$ ) |       |
|-----------|-------------------------|-------|
|           | $m_h$                   | $m_e$ |
| <i>a</i>  | -0.290                  | 0.085 |
| <i>b</i>  | -0.568                  | 3.503 |
| <i>c</i>  | -0.481                  | 1.519 |
